# Supplementary material for: Anaesthesia-Relevant Disease Manifestations and Perianaesthetic Complications in Patients with Mucolipidosis—A Retrospective Analysis of 44 Anaesthetic Cases in 12 Patients
Source: MDPI journal article supplement (doi:10.3390/jcm11133650), 2022-06-24
Supplement: s1 [file s1]

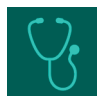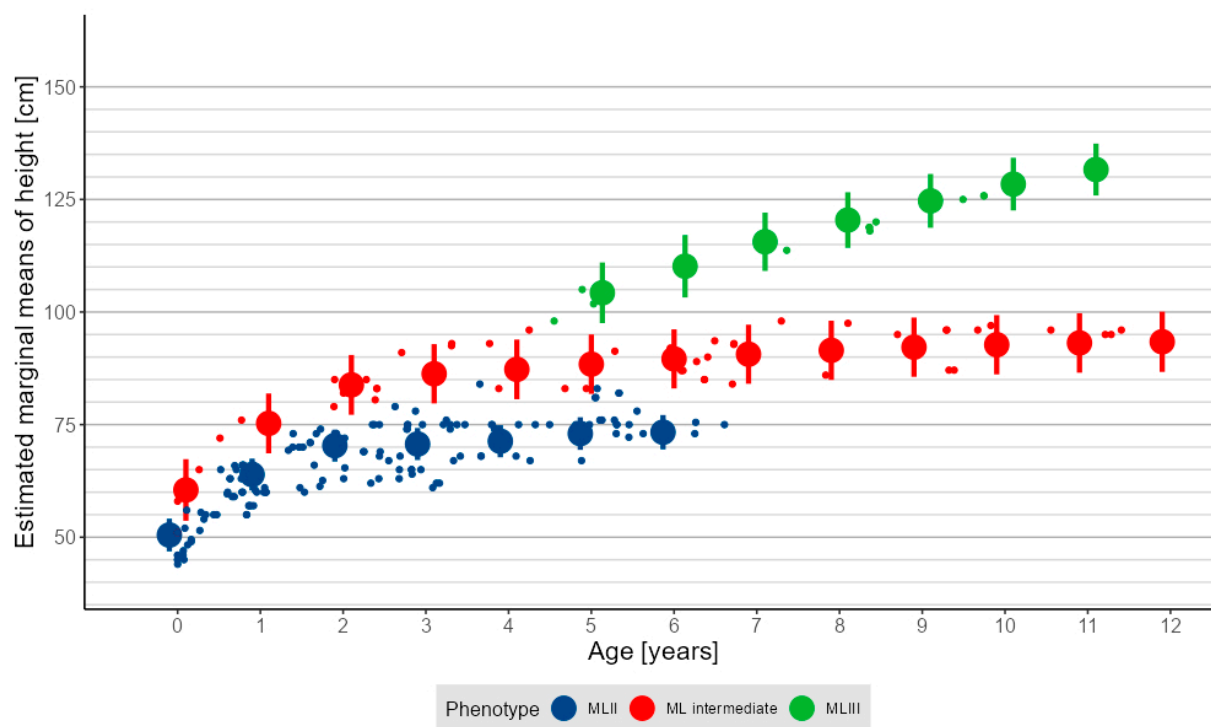

**Figure S1.** Estimated marginal means of the height of patients with mucopolipidosis (MLII n=7, ML intermediate n=2, MLIII n=3).

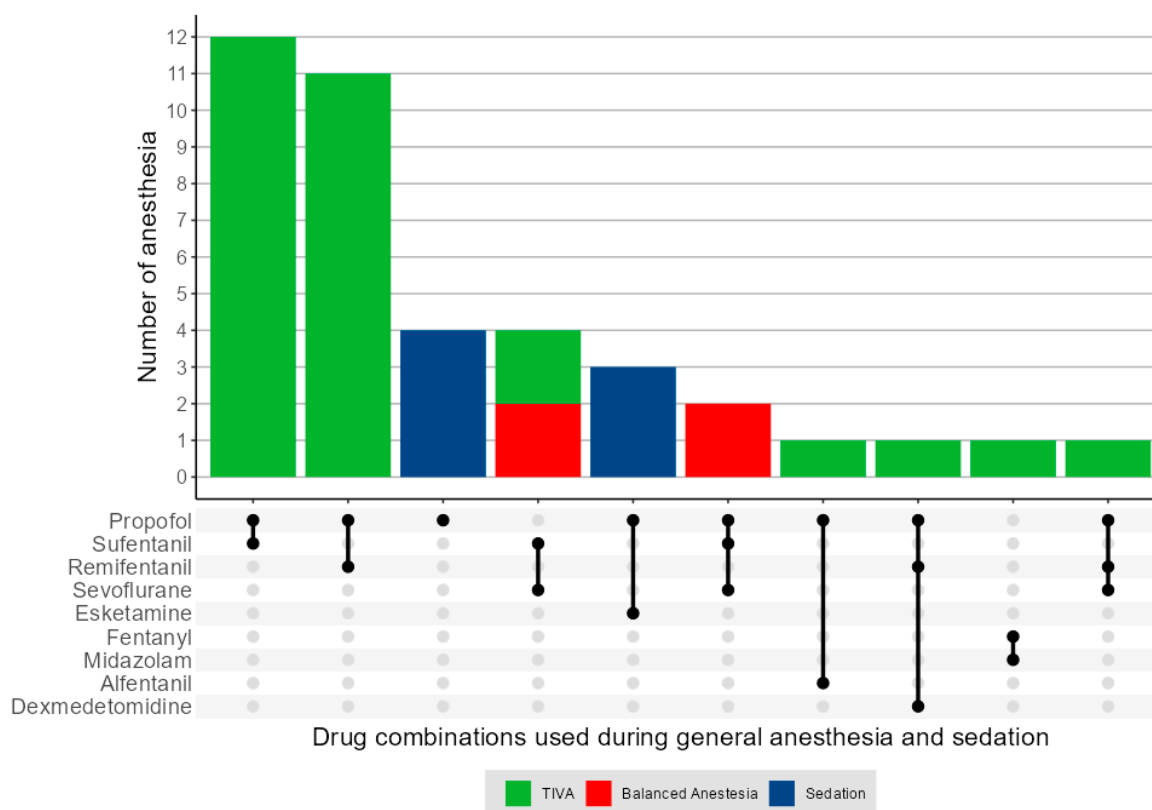

**Figure S2.** Frequency of drug combinations used during general anesthesia and sedation. TIVA, total intravenous anesthesia.

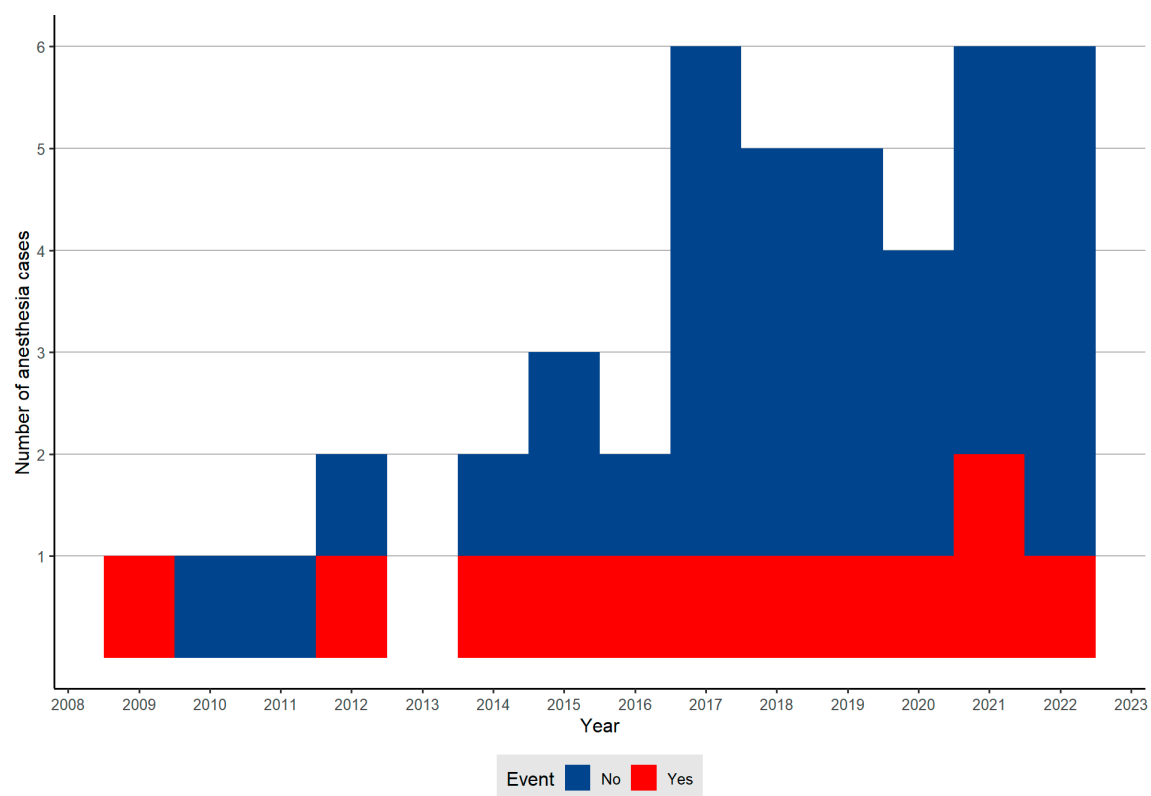

**Figure S3.** Center experience. Cases numbers of patients with mucopolipidosis undergoing anaesthesia with and without complications during the study.
